# Supplementary material for: Technical note: Accelerate coccolith size separation via repeated centrifugation
Source: Copernicus journal article supplement (doi:10.5194/bg-2020-341), 2020-12-10
Supplement: Supplementary file 1 [file bg-2020-341-supplement.zip]

## 1 Supporting information

2

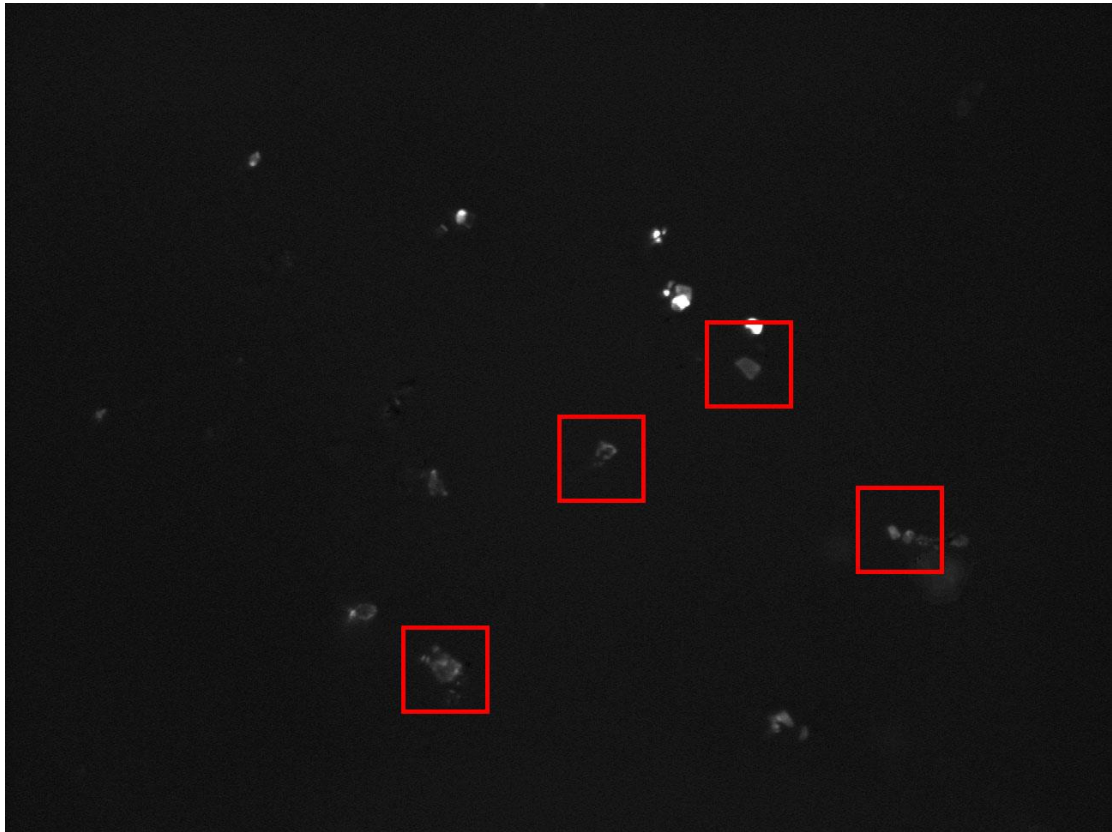

3

4 **Figure S1.** Coccolith counting in Fp-12 test (*F. profunda* in 70% glycerol centrifuged  
5 for 12 min): coccoliths marked by red squares are *F. profunda* and other particles are  
6 none-coccolith particles with similar or smaller sinking velocity as that of *F.*  
7 *profunda*. The exposure of this picture was enhanced 2 times in Photoshop because of  
8 the dim of *F. profunda*.

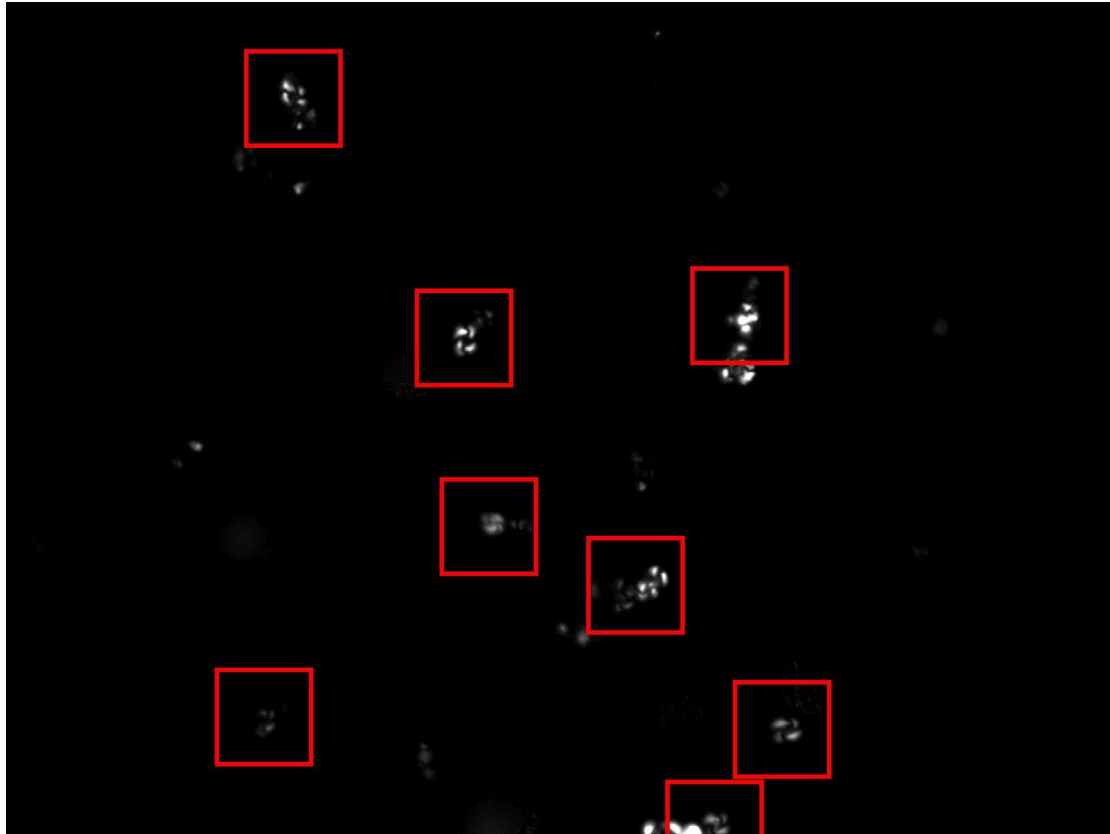

9

10 **Figure S2.** Coccolith counting in the G60-1min test (small *Gephyrocapsa* in 60%  
 11 glycerol centrifuged for 1 min): coccoliths marked by red squares are *Gephyrocapsa*  
 12 spp. and other particles are none-coccolith particles with similar or smaller sinking  
 13 velocity as that of *Gephyrocapsa* spp.

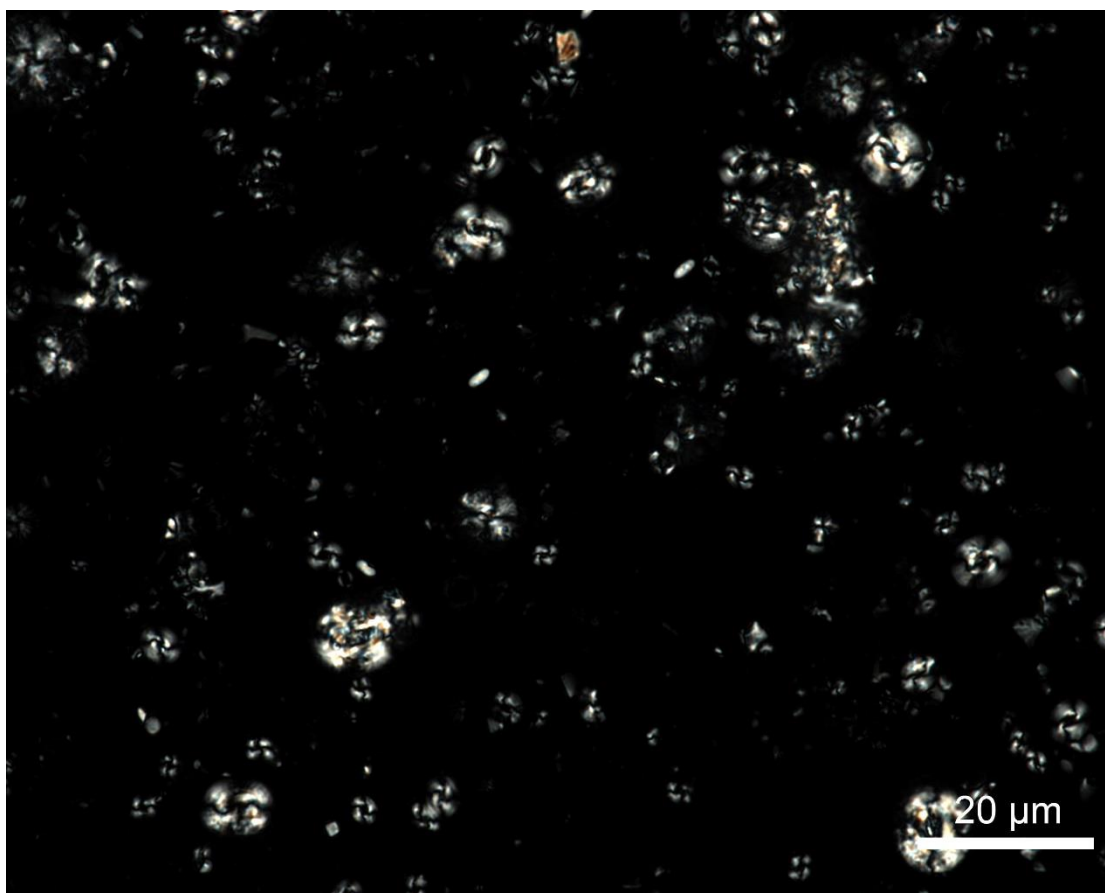

14

15

**Figure S3.** The raw sediment of ODP 982B 56X Section 5 5-9cm.

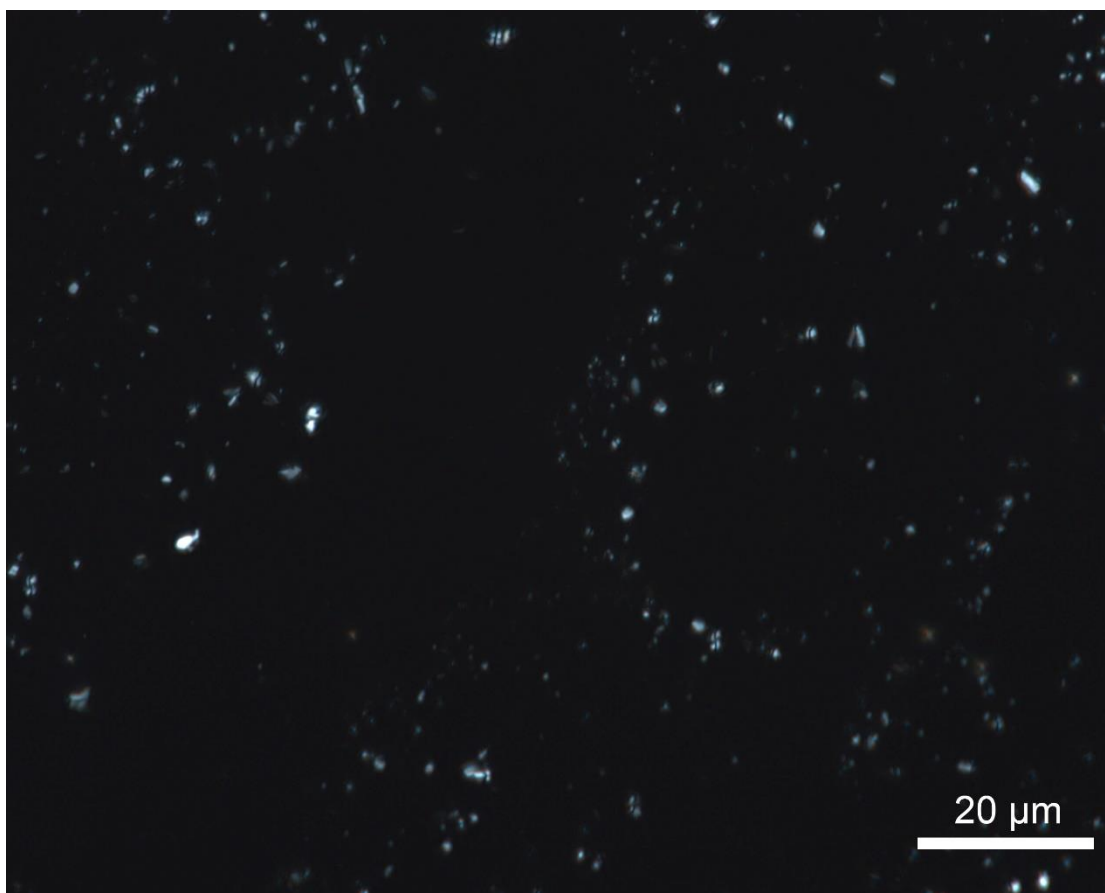

**Figure S4.** Particles harvested after centrifuging by 2250 rpm and 1 min. Most of particles in this size fraction are coccolith fragments and non-coccolith carbonate.

19

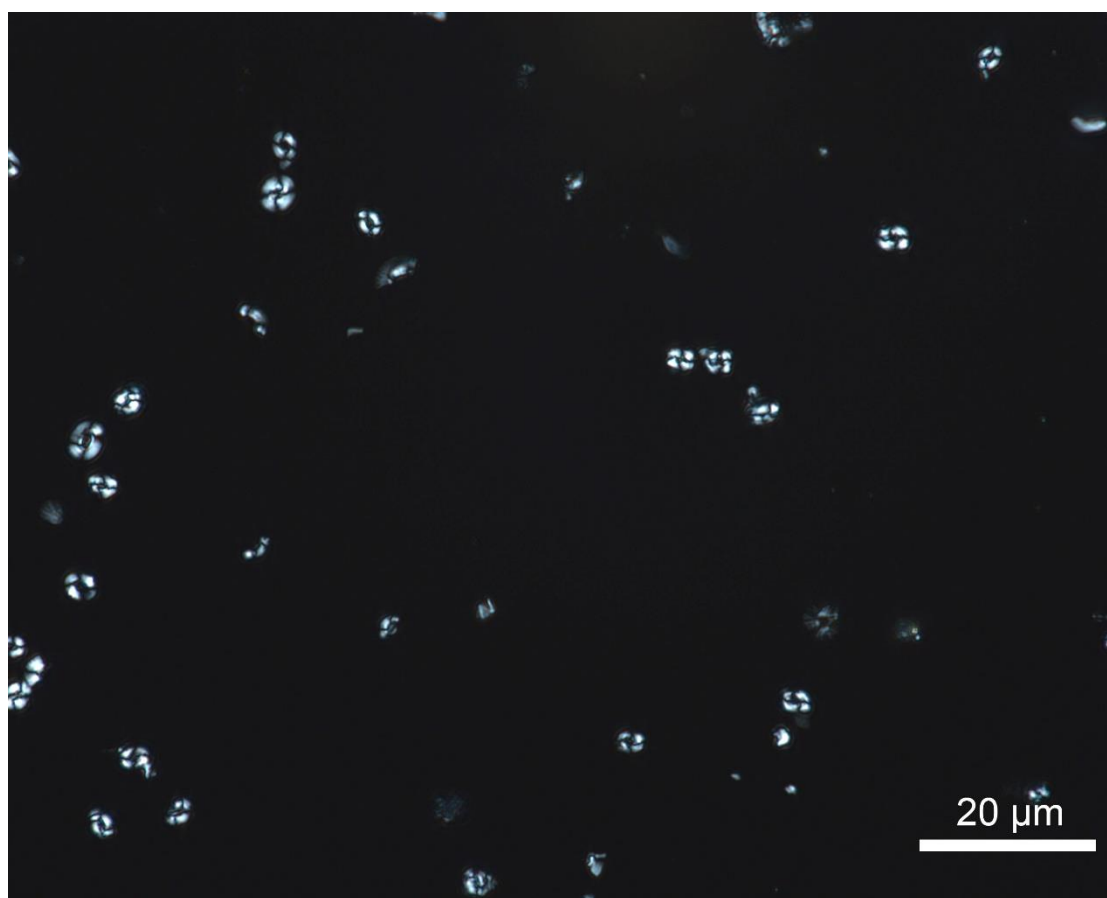

20

21

**Figure S5.** Particles harvested after centrifuging by 2250 rpm and 1 min.

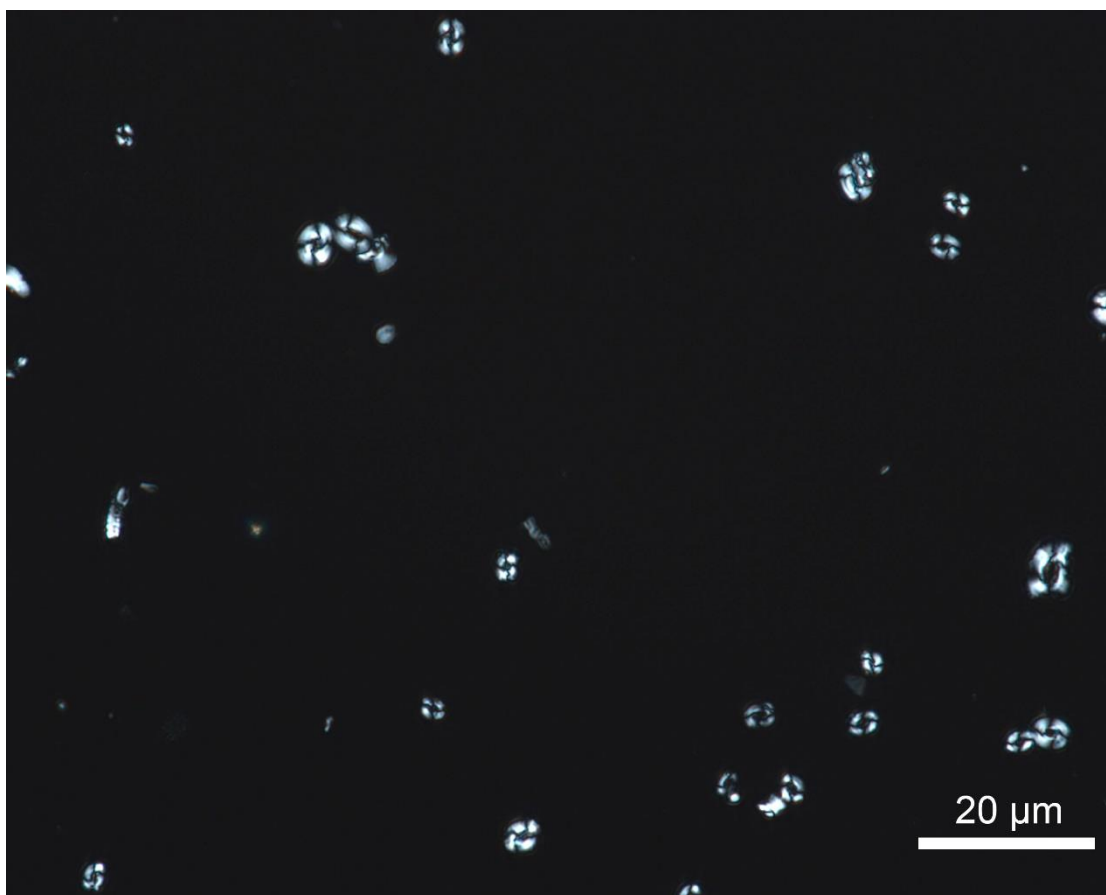

**Figure S6.** Particles harvested after centrifuging by 1400 rpm and 1min.

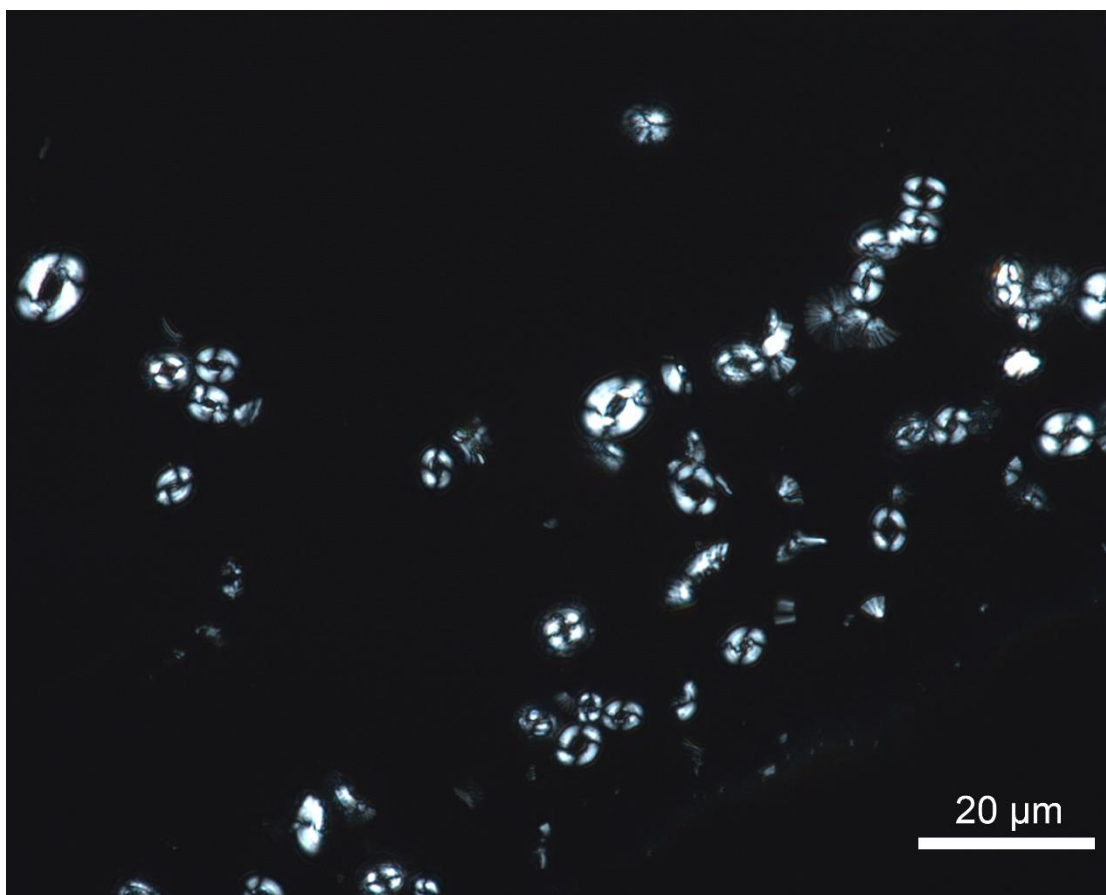

**Figure S7.** Particles harvested after centrifuging by 1000 rpm and 1 min

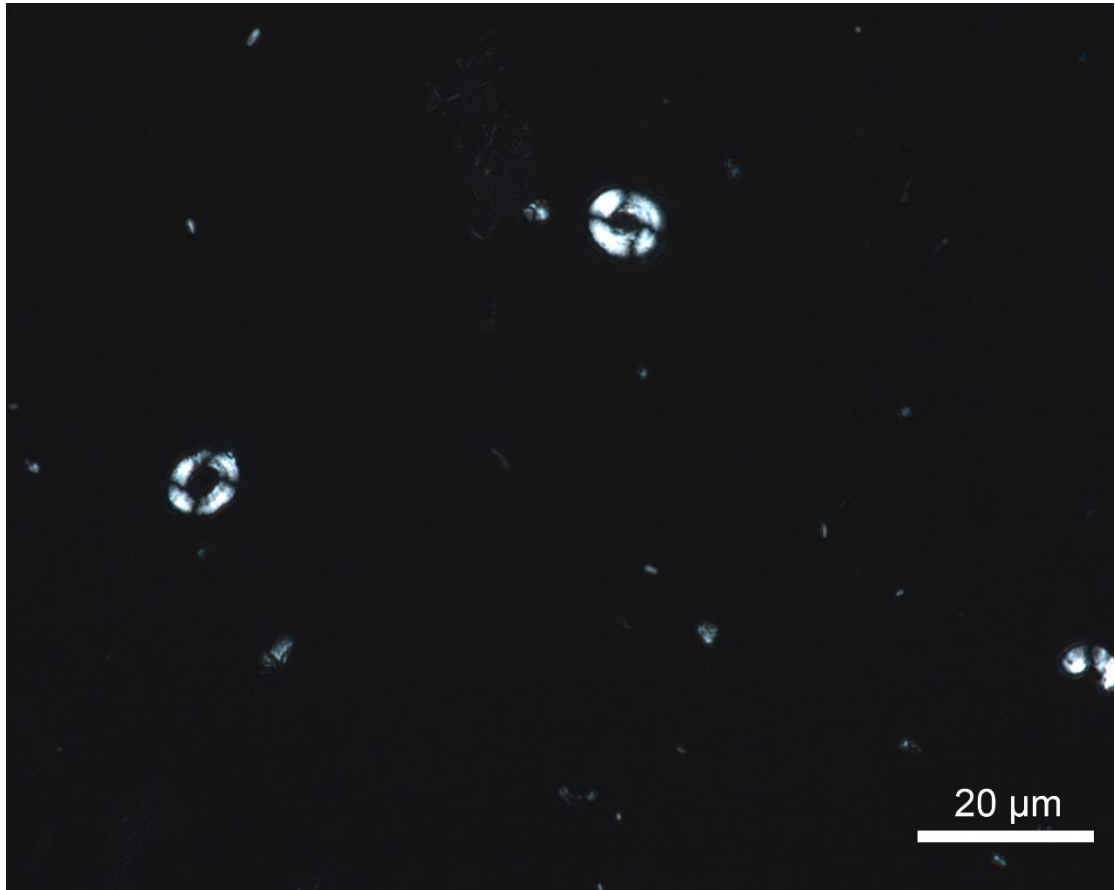

**Figure S8.** Particles harvested after centrifuging by 600 rpm 1min. The coccoliths in this step were dissolved because of lacking enough ammonia buffering after five steps of separation.



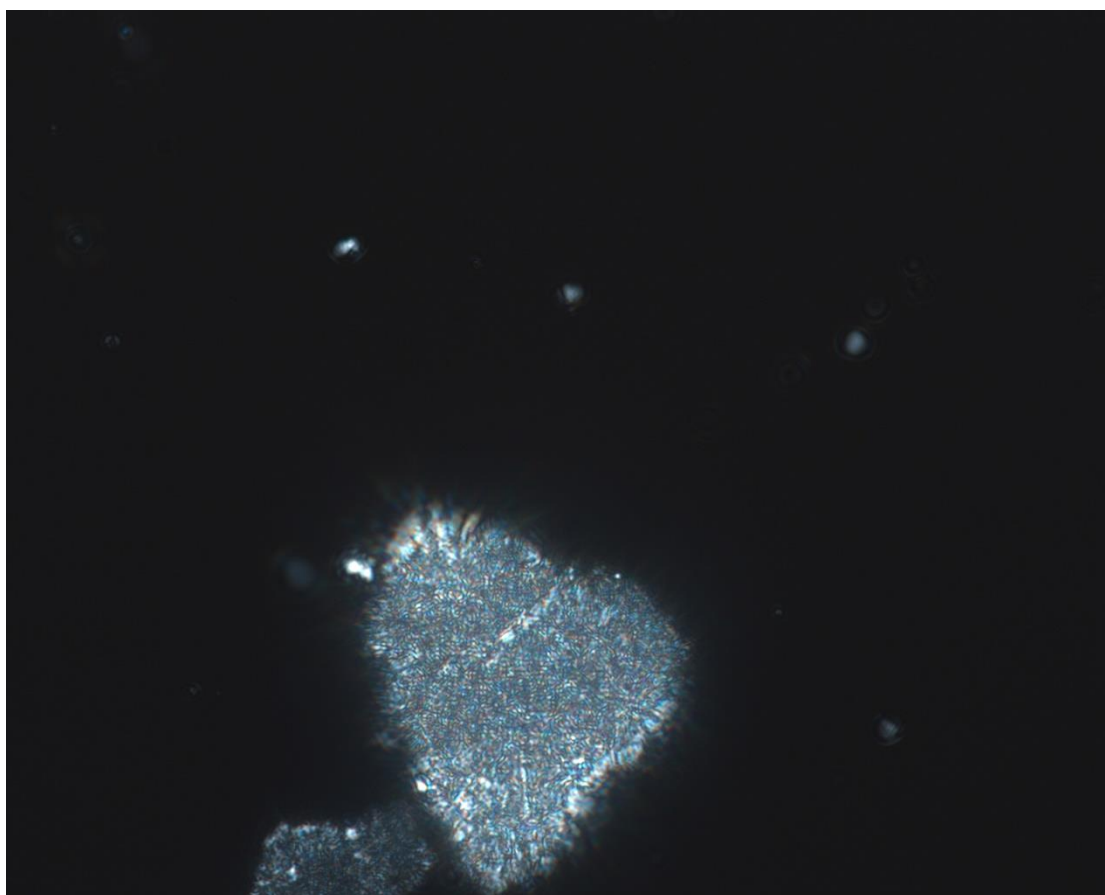

**Figure S9.** Particles left in the suspension after 5 steps separations. The biggest carbonate particle should be a fragment of foraminifera shell.
